# Supplementary material
Source: PubMed Central journal article supplement (PMC10998757)
Supplement: ajcr0014-1204-f7.pdf [file ajcr0014-1204-f7.pdf]

## USP5 promotes tumorigenesis in osteosarcoma

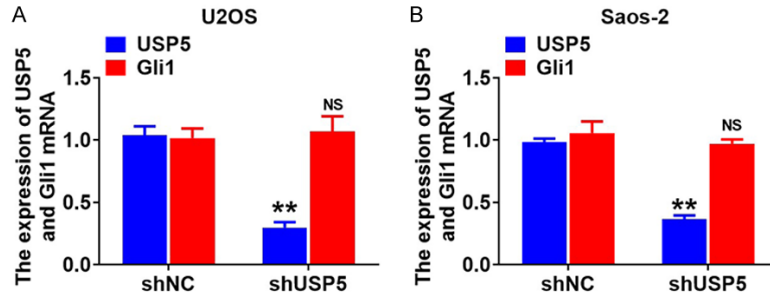

**Supplementary Figure 1.** The mRNA levels of USP5 and Gli1 were detected. (A and B) The mRNA levels of USP5 and Gli1 assessed by qRT-PCR in U2OS (A) and Saos-2 (B) cells transfected with shNC or shUSP5.

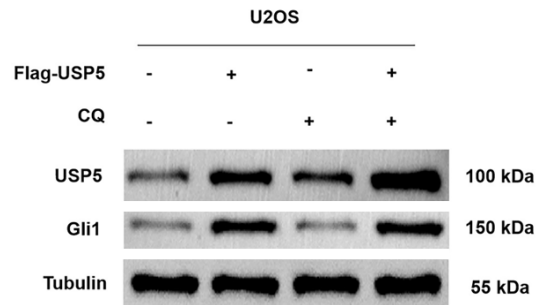

**Supplementary Figure 2.** USP25-overexpressing OS cells were treated with or without CQ treatment. Cells were collected and subjected to Western blot analysis with the antibodies indicated.

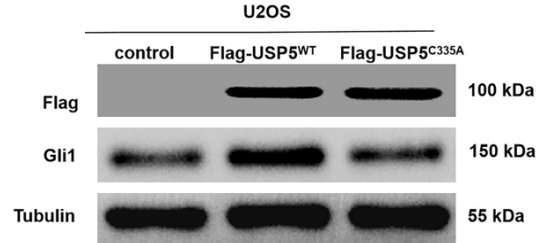

**Supplementary Figure 3.** The U2OS cells were transfected with control, USP5<sup>WT</sup>, or USP5<sup>C335A</sup> overexpressed plasmid. Cells were collected and subjected to Western blot analysis with the antibodies indicated.
